1           **Threshold regulation and stochasticity from the MecA/ClpCP**  
2           **proteolytic system in *Streptococcus mutans* competence**

3  
4  
5  
6  
7  
8  
9  
10  
11  
12  
13  
14  
15  
16  
17  
18  
19  
20  
21  
22  
23  
24  
25  
26

M. Son<sup>1</sup>, J. Kaspar<sup>2</sup>, S.J. Ahn<sup>2</sup>, R.A. Burne<sup>2</sup>, S.J. Hagen<sup>1\*</sup>

1. Department of Physics, University of Florida, Gainesville FL 32611

2. Department of Oral Biology, University of Florida, Gainesville FL 32610

\*To whom correspondence should be addressed:

Address: Physics Department, University of Florida, PO Box 118440, Gainesville FL 32611-

8440

Tel. 352 392 4716

Email: [sjhagen@ufl.edu](mailto:sjhagen@ufl.edu)

Running title: Thresholding and stochasticity from MecA/ClpCP

Keywords: transformation, single cell, microfluidic, noise, phenotypic heterogeneity, quorum sensing

27 **Summary**

28 Many bacterial species use the MecA/ClpCP proteolytic system to block entry into genetic  
29 competence. In *Streptococcus mutans*, MecA/ClpCP degrades ComX (also called SigX), an  
30 alternative sigma factor for the *comY* operon and other late competence genes. Although the  
31 mechanism of MecA/ClpCP has been studied in multiple *Streptococcus* species, its role within  
32 noisy competence pathways is poorly understood. *S. mutans* competence can be triggered by  
33 two different peptides, CSP and XIP, but it is not known whether MecA/ClpCP acts similarly for  
34 both stimuli, how it affects competence heterogeneity, and how its regulation is overcome. We  
35 have studied the effect of MecA/ClpCP on the activation of *comY* in individual *S. mutans* cells.  
36 Our data show that MecA/ClpCP is active under both XIP and CSP stimulation, that it provides  
37 threshold control of *comY*, and that it adds noise in *comY* expression. Our data agree  
38 quantitatively with a model in which MecA/ClpCP prevents adventitious entry into competence  
39 by sequestering or intercepting low levels of ComX. Competence is permitted when ComX  
40 levels exceed a threshold, but cell-to-cell heterogeneity in MecA levels creates variability in that  
41 threshold. Therefore MecA/ClpCP provides a stochastic switch, located downstream of the  
42 already noisy *comX*, that enhances phenotypic diversity.

43

## 44 **Introduction**

45 Many species of streptococci can become naturally transformable by entering the transient  
46 physiological state known as genetic competence (Fontaine *et al.*, 2014; Johnston *et al.*, 2014).  
47 Competence plays a particularly important role for the oral pathogen *Streptococcus mutans*,  
48 influencing cell growth, death, interactions with other members of the oral flora and expression  
49 of known virulence traits. Bacteriocin production, biofilm formation, acid production and  
50 tolerance of acid and oxidative stresses by *S. mutans* all facilitate the competition, persistence  
51 and virulence of this organism in the human oral biofilm environment (J. A. Lemos; Burne,  
52 2008). All of these traits are linked to the expression of ComX (also called SigX), an alternative  
53 sigma factor that activates competence genes required for DNA uptake and processing. ComX  
54 production is controlled by a pathway that integrates signals received from two quorum sensing  
55 peptides (Shanker; Federle, 2016) with environmental cues such as pH (Guo *et al.*, 2014; Son  
56 *et al.*, 2015b) and oxygen and reactive oxygen species (De Furio *et al.*, 2017), intracellular noise  
57 (stochasticity) and positive and negative feedback (Smith; Spatafora, 2012; LeungDufour *et al.*,  
58 2015; Reck *et al.*, 2015; Son *et al.*, 2015a; Hagen; Son, 2017). As a result, *S. mutans*  
59 competence is a complex and heterogeneous behavior that can be exquisitely sensitive to the  
60 extracellular environment and that remains incompletely understood.

61

62 Population heterogeneity in *S. mutans* competence is evident from the low efficiency of natural  
63 genetic transformation (Y. Li *et al.*, 2001), as well as from observations of cell-to-cell variability  
64 in *comX* gene expression (Lemme *et al.*, 2011; Son *et al.*, 2012; Reck *et al.*, 2015; Hagen; Son,  
65 2017). Transformation efficiency in biofilms is typically less than 0.1% (Y. Li *et al.*, 2001), while  
66 even under very favorable conditions no more than 10-50% of cells naturally express *comX*  
67 (Lemme *et al.*, 2011; Son *et al.*, 2012). In addition, the expression of *comX* can be bimodal or  
68 unimodal in the population, depending on the exogenous signals present, the growth phase and  
69 the environment (Son *et al.*, 2012; Shields; Burne, 2016). Post-translational regulation of ComX

70 also appears to generate heterogeneity, as high levels of *comX* mRNA do not assure robust  
71 activation of *comY* (Seaton *et al.*, 2011). As with many other bacterial regulatory proteins  
72 (Inobe; Matouschek, 2008), ComX levels in *S. mutans* are modulated post-translationally by an  
73 ATP-dependent protease system composed of MecA and ClpCP (Tian *et al.*, 2013; Dong *et al.*,  
74 2014; Dufour *et al.*, 2016). The MecA/ClpCP complex inhibits competence by targeting and  
75 degrading ComX, as it does in streptococci of the salivarius, mitis and pyogenic groups  
76 (Bjornstad; Havarstein, 2011; Boutry *et al.*, 2012; Wahl *et al.*, 2014; Y. H. Li; Tian, 2017).  
77 However, the function of MecA/ClpCP within the *S. mutans* competence pathway, and  
78 particularly its role in cell-to-cell heterogeneity and the bimodal and unimodal competence  
79 behaviors, has not been explored in detail.

80

81 Figure 1 summarizes the competence regulatory pathway in *S. mutans* (Smith; Spatafora, 2012;  
82 Tian *et al.*, 2013; Shanker; Federle, 2016). ComX activates late competence genes that include  
83 the nine-gene operon *comYA-I*, which contains seven genes that are required for transformation  
84 (Merritt *et al.*, 2005). Transcription of *comX* can be triggered by either of two quorum sensing  
85 peptides: CSP (c̄ompetence s̄timulating p̄eptide) or XIP (SigX̄-inducing p̄eptide). The efficacy of  
86 these peptides is sensitive to environmental factors, including pH, oxidative stress, carbohydrate  
87 source, and the peptide content of the medium.

88

89 CSP is derived from the ComC precursor, processed to a final length of 18 aa and exported to  
90 the extracellular medium. *S. mutans* detects CSP through the ComDE two-component signal  
91 transduction system (TCS), which directly activates multiple genes involved in bacteriocin  
92 biogenesis, secretion and immunity. However, *S. mutans* ComDE does not directly activate  
93 *comX*. Instead, the ComRS system is the immediate regulator of *comX* in the mutans,  
94 salivarius, bovis, and pyogenes groups of streptococci (Mashburn-Warren *et al.*, 2010). The  
95 ComRS system consists of the cytosolic receptor ComR and the 17-aa peptide ComS, which is

96 processed by an unknown mechanism to form the 7-aa XIP. Extracellular XIP is imported by the  
97 oligopeptide permease Opp and interacts with ComR to form a complex that activates the  
98 transcription of *comS* and *comX*. Exogenous XIP induces *comX* efficiently in chemically defined  
99 media lacking small peptides (such as FMC or CDM (Mashburn-Warren *et al.*, 2010; Son *et al.*,  
100 2012)), leading to population-wide induction of *comX* at saturating XIP levels. However, XIP  
101 elicits no induction of *comX* in complex growth media containing small peptides, possibly owing  
102 to peptide competition with XIP for uptake by Opp. Interestingly, the CSP peptide signal has a  
103 different action than XIP, as it activates *S. mutans comX* only in complex growth media  
104 containing small peptides. It elicits no activity from *comX* in defined media that lacks small  
105 peptides, even though CSP stimulates the ComDE TCS (leading to bacteriocin production)  
106 under these conditions. In addition, the *comX* response to CSP is bimodal in the population,  
107 with no more than 50% of cells expressing *comX* at saturating CSP concentrations (Son *et al.*,  
108 2012).

109  
110 Consequently, the activation of *comX* in a population of *S. mutans* can exhibit two types of  
111 heterogeneity: a unimodal distribution when stimulated by exogenous XIP and a bimodal  
112 distribution when stimulated by exogenous CSP. Only the bimodal behavior requires an intact  
113 *comS*, whereas only the unimodal behavior requires the oligopeptide permease *opp*. We  
114 previously posited that these different behaviors are two modes of operation of the  
115 transcriptional feedback loop associated with *comS*, which encodes its own inducing signal. In  
116 the unimodal case the cells import and respond to exogenous XIP, whereas in the bimodal case  
117 XIP import is blocked, leaving each cell to respond to its intracellular ComS (or XIP). The first  
118 mode allows a generally uniform, population-wide activation of *comX*, but the second mode  
119 leads to noisy, positive feedback dynamics in both *comS* and *comX* (Son *et al.*, 2012; Hagen;  
120 Son, 2017).

121

122 The mechanism of posttranslational control of ComX by MecA/ClpCP in *S. mutans* resembles  
123 that in pyogenic and salivarius streptococci, to which *S. mutans* MecA is closely homologous  
124 (Boutry *et al.*, 2012; Wahl *et al.*, 2014). *S. mutans* MecA is a 240 aa adapter protein that  
125 interacts with ComX and ClpC to form a ternary complex that sequesters ComX and targets it  
126 for ATP-dependent degradation by the ClpP protease (Tian *et al.*, 2013; Dong *et al.*, 2014).  
127 MecA/ClpCP similarly controls the master competence regulators ComW in *S. pneumoniae*  
128 (Wahl *et al.*, 2014) and ComK in *Bacillus subtilis* (Turgay *et al.*, 1998). In *B. subtilis* MecA was  
129 shown to facilitate the ATP-dependent formation of the ClpCP proteolytic complex, which  
130 unfolds and degrades both MecA and its ComK target, and then itself dissociates (Mei *et al.*,  
131 2009; Liu *et al.*, 2013). Therefore MecA/ClpCP operates dynamically by continuously turning  
132 over MecA as well as its regulatory target if present.

133  
134 Several studies in *S. mutans* have established that MecA/ClpCP suppresses the activation of  
135 *comY* under CSP stimulation, in complex media (Tian *et al.*, 2013; Dong *et al.*, 2014; Dufour *et*  
136 *al.*, 2016). Deletion of *mecA*, *clpC*, or *clpP* increased ComX levels and transformability during  
137 growth in complex media and also prolonged the competent state. These studies imply that  
138 MecA/ClpCP serves either to suppress *S. mutans* competence or to switch it off as growth  
139 progresses, in complex media. Some studies have found the puzzling result that deletion of  
140 *mecA* or *clpCP* caused a weaker increase in ComX levels or transformability - or even had no  
141 effect at all – in chemically defined media (with added XIP) than in complex media (with CSP)  
142 (Boutry *et al.*, 2012; Tian *et al.*, 2013; Dong *et al.*, 2014; Dufour *et al.*, 2016). A subsequent  
143 study found that MecA deletion improved *S. salivarius* transformability in defined media,  
144 although the difference was attenuated at high levels of XIP stimulation (Wahl *et al.*, 2014).

145  
146 The possible significance of growth media and the presence of heterogeneity raise the question  
147 of how MecA/ClpCP functions within the full competence pathway, in which the XIP and CSP

148 signaling pathways activate *comX* in defined and complex media respectively. Although it  
149 seems clear that *MecA/ClpCP* inhibits *comY* expression by sequestering and degrading ComX,  
150 a clearer model of how this regulation integrates with the known *comX* activation pathway, and  
151 how it may be overcome when competence is permitted, is still needed. Additional cell density  
152 signals (Dufour *et al.*, 2016), as well as XIP-dependent feedback or additional gene products  
153 (Wahl *et al.*, 2014), have been proposed as mechanisms for modulating ComX levels via  
154 *MecA/ClpCP*. We have used a single-cell, microfluidic approach to clarify some of these  
155 questions and to develop an explicit model of how *MecA/ClpCP* interacts with the noisy and  
156 bimodal mechanisms controlling *S. mutans comX*. Our data lead to a simple quantitative model  
157 that reproduces both the population average behavior and the cell-to-cell heterogeneity in *comY*  
158 activation.

159

## 160 **Results**

### 161 *MecA/ClpCP* affects transformation efficiency of *S. mutans* induced by XIP

162 Supporting Figure S4 shows how deletions in the *MecA/ClpCP* system affect transformation  
163 efficiency of *S. mutans* UA159. Transformability was measured in cells cultured in defined  
164 medium (FMC) containing various concentrations of XIP, as indicated. At the highest XIP  
165 concentration (1  $\mu$ M), the transformation efficiencies of the *mecA* and *clpC* deletion mutants  
166 were similar to the wild type. This finding is consistent with previous reports for *S. mutans* (Tian  
167 *et al.*, 2013; Dong *et al.*, 2014) and *S. thermophilus* (Boutry *et al.*, 2012), where little or no effect  
168 of *mecA* deletion on transformability in response to XIP was observed. However the behavior of  
169 the mutants diverged at lower XIP concentrations, where deficiency of *MecA* or *ClpCP*  
170 enhanced transformability. An effect of XIP concentration on the behavior of deletion mutants  
171 was also reported for *S. salivarius* (Wahl *et al.*, 2014). Both  $\Delta clpP$  and  $\Delta clpC$  had higher  
172 transformation efficiency than the wild type at 10 nM XIP. Surprisingly the *mecA* deletion  
173 showed lower transformability than the wild type strain at 100 nM XIP; we note however this

174 strain grows poorly and displays defects in cell morphology and decreased viability. Overall  
175 these data confirm that the MecA/ClpCP system interacts with XIP induction of transformability  
176 in defined medium. To obtain more detailed insight into XIP stimulation, MecA/ClpCP and *comY*  
177 activation, we turned to individual cell studies.

178

### 179 *Activation of comX leads to heterogeneous induction of comY*

180 We used dual fluorescent reporters (*PcomX-gfp*, *PcomY-rfp*) to compare the activation of  
181 *PcomX* and *PcomY* in individual *S. mutans* supplied with exogenous XIP. Figure 2A shows *S.*  
182 *mutans* UA159 growing in microfluidic channels under a constant flow of defined medium (FMC)  
183 that contains 0-2  $\mu\text{M}$  XIP. *PcomX* is activated in all cells if the XIP concentration exceeds about  
184 100 nM, and its activation saturates as XIP exceeds about 800 nM. However, very few cells  
185 activate *PcomY* at XIP concentrations of 400 nM or less, and cells that do activate *PcomY* vary  
186 widely in their red fluorescence intensity. Even at 1-2  $\mu\text{M}$  XIP, many cells exhibit little *PcomY*  
187 activity.

188

189 Figures 2B-2C show the statistical distribution of *PcomX* (GFP, upper rows) and *PcomY* (RFP,  
190 lower rows) reporter fluorescence for cells in response to exogenous XIP or CSP. Reporter  
191 fluorescence was imaged while cells grew in microfluidic channels under continuous flow of  
192 defined medium for XIP (Figure 2B), or of complex medium for CSP (Figure 2C). As previously  
193 reported (Son *et al.*, 2012), XIP in defined medium elicits a noisy but generally unimodal  
194 (population-wide) *comX* response. In contrast, CSP in complex medium elicits a much noisier,  
195 bimodal (double peaked distribution) *comX* response. For both CSP and XIP stimulation, the  
196 response of *PcomY* is highly heterogeneous. Even the highest concentrations of CSP and XIP,  
197 which saturate the response of *PcomX*, incompletely activate *PcomY* in the population; the  
198 *PcomY* expression levels in individual cells span 2-3 orders of magnitude above the baseline.  
199 These data suggest that post-translational regulation of ComX increases cell-to-cell



200 heterogeneity in *comY* expression, which adds to the noise in the *comX* response to CSP or XIP  
201 stimulation.

202

203 *The MecA/ClpCP system inhibits the comY response to XIP and increases its noise*

204 To test whether the MecA/ClpCP proteolytic system affects ComX function in defined medium,  
205 and to assess its effect on noise in *comY* expression, we compared *comX* and *comY* expression  
206 in dual reporter strains in the wild-type (UA159) and  $\Delta mecA$  genetic backgrounds. Figure 3  
207 shows  $P_{comY}$  activity in individual cells that were stimulated by XIP in planktonic culture in  
208 defined medium and then imaged on glass slides. Similar results were obtained for cells  
209 growing in microfluidic flow channels. Deletion of *mecA* altered the  $P_{comY}$  response in two  
210 ways. First, the  $\Delta mecA$  strain responded more strongly to XIP than did the wild type. Unlike the  
211 wild-type genetic background, the  $\Delta mecA$  cells showed high median  $P_{comY}$  expression,  
212 exceeding the baseline level at XIP concentrations greater than about 200 nM. Second, deletion  
213 of *mecA* reduced noise in *comY* expression (Figure 3C, 3D). Although *comY* and *comX*  
214 expression correlated positively in UA159, the correlation was partially obscured by the noisy  
215 behavior of *comY*. In contrast, *comY* expression increased systematically as *comX* expression  
216 increased in the  $\Delta mecA$  strain. Despite some noise in *comY*, a roughly proportional relationship  
217 can be discerned in the data of Figure 3D, but not in Figure 3B. (The upward curvature in Figure  
218 3D results from the logarithmic horizontal axis.) The nearly linear correlation between *comY* and  
219 *comX* in the  $\Delta mecA$  mutant suggests that, in the absence of MecA/ClpCP, ComX activates  
220 *comY* in a direct and predictive fashion.

221

222 The effect of MecA on noise in *comY* is also seen in histograms of *comY* expression at given  
223 *comX* expression levels. Supporting Figure S2 shows *comY* histograms for cells growing in  
224 microfluidic channels with flowing defined medium and XIP, binned according to their *comX*  
225 activity. Both at high and low *comX* activity, the shape of the *comY* histograms is qualitatively

226 different in the two strains. The deletion of *mecA* qualitatively alters the relationship between  
227 *comY* and *comX* expression in defined medium with addition of XIP.

228

229 *comY* and *comX* expression are simply correlated in the absence of *MecA*

230 As is common for bacterial protein expression (Taniguchi *et al.*, 2010), the histograms of  $P_{comY}$

231 expression (Supporting Figure S2) resemble a gamma distribution  $\Gamma(n | A, B)$ , a two-parameter

232 continuous probability distribution that can be interpreted in terms of sequential, stochastic

233 processes of transcription and translation (see *Methods*). This finding, together with the roughly

234 linear correlation between *comY* and *comX* activity in the  $\Delta mecA$  strain (Figure 3D), motivates a

235 simple mathematical model for *comX/comY* in the absence of *MecA/CipCP*. The model is

236 described in the *Methods*: *comY* is activated in a mostly linear (but saturating) fashion by *comX*

237 on average, but is also subject to stochasticity. The *comY* activity in a given cell is thus a

238 random variable drawn from a gamma distribution whose parameters are determined by the

239  $P_{comX}$  activity in the cell. The model has four parameters, which we obtained through a

240 maximum likelihood fit to the  $\Delta mecA$  individual cell RFP and GFP fluorescence data of Figure

241 3D. We then used these parameters to generate a stochastic simulation of the model for

242 comparison to the data.

243

244 Figure 4 compares the  $\Delta mecA$  experimental data (Figure 4A, 4B) with a simulation of the model

245 (Figure 4C, 4D). The model accurately reproduces both the population-averaged *comY*

246 response and its cell-to-cell variability. This result indicates that in the absence of *MecA/CipCP*

247 regulation of *ComX*, *comY* can be modeled as a typical noisy gene whose average activation is

248 proportional to the concentration of active *ComX* protein.

249

250 A plausible alternative model is that extracellular XIP concentration, rather than  $P_{comX}$  activity

251 *per se*, controls *comY* expression in  $\Delta mecA$ . The simulation shown in Supporting Figure S3

252 indicates that the best fit of this model significantly overestimates the noise in *PcomY*. In short,  
253 modeling suggests that the *PcomX* activity of a  $\Delta mecA$  cell is a straightforward predictor of its  
254 *PcomY* activity, and is also a better predictor than is the XIP concentration.

255

256 *Different deletions in MecA/ClpCP produce different noise and threshold behaviors in comY*

257 To determine which elements of the MecA/ClpCP system affect sensitivity and noise in *comY*,  
258 we measured *PcomY* and *PcomX* activity in the UA159,  $\Delta mecA$ ,  $\Delta clpC$  and  $\Delta clpP$  genetic  
259 backgrounds (Figure 5). All strains carried the dual fluorescent reporters and were imaged in  
260 microfluidic chambers while supplied with a continuous flow of defined medium containing XIP.  
261 In all strains, *PcomY* was more strongly activated at higher XIP concentrations where *PcomX*  
262 expression was higher, although noise and sensitivity varied among the different strains (Figure  
263 5A). All strains showed a similar dependence of *PcomX* activity (GFP) on XIP concentration  
264 (Figure 5B). In the relation between *comY* and *comX* expression, the UA159 (wild type) showed  
265 a more pronounced threshold in the onset of *comY* activation, at a *comX* level near 300 units,  
266 and much greater noise in *comY* expression. The *clpP* deletion strain, in which the MecA/ClpC  
267 complex can presumably bind, but not degrade, ComX, showed slightly less noisy *comY*  
268 expression than the wild type and *comY* was somewhat more readily activated. Deletion of *clpC*,  
269 or especially *mecA*, reduced *comY* noise significantly, such that the population was almost  
270 uniformly activated when *PcomX* expression was strong, near 1  $\mu$ M XIP. Therefore, the  
271 interaction between MecA/ClpC and ComX, as well as the proteolytic action of ClpP on that  
272 complex, contribute to noise in *comY* expression and also suppress the ability of *comX*  
273 expression to elicit the *comY* response. Similar data were obtained when cells were grown in  
274 static medium and image while dispersed on glass slides.

275

276 *The role of MecA alone can be modeled by simple sequestration of ComX*

277 A detailed model for the regulation of ComX by MecA/ClpCP must include the formation of the  
278 MecA/ClpC/ComX ternary complex, as well as the kinetics of ComX and MecA degradation by  
279 ClpP. Both of these mechanisms are absent in the  $\Delta clpC$  strain, although the binary interaction  
280 of MecA with ComX is present. Therefore, we tested whether a binary sequestration (MecA +  
281 ComX) model could reproduce our data for the activation of *comY* by ComX in the  $\Delta clpC$  strain.  
282 In this model, described in *Methods*, individual ComX molecules are presumed to be tightly  
283 sequestered by individual MecA molecules, leaving them unavailable to stimulate *comY*  
284 transcription. Then the probability distribution for the *comY* expression of a cell becomes  
285 determined not by its *comX* activity alone, but by the excess of ComX over MecA copy  
286 numbers. We modeled the MecA copy number as a random variable drawn from a gamma  
287 probability distribution; the activation of *comY* by the available (unsequestered) ComX is  
288 modeled as in Figure 4. The MecA probability distribution is presumed to be independent of XIP,  
289 consistent with our mRNA measurements showing no effect of XIP on *mecA*, *clpC* or *clpP*  
290 expression (Supporting Table ST1). Fitting this MecA model to the  $\Delta clpC$  data therefore  
291 requires only a two-parameter fit for the gamma distribution parameters, which we obtained by  
292 maximum likelihood comparison of the data and model.

293

294 Figure 6 compares the  $\Delta clpC$  data with a stochastic simulation of this model. The *comY* - *comX*  
295 correlation closely resembles the experimental data, both in its average trend and its noise.  
296 These results show that the higher *comY* expression noise that is observed in the  $\Delta clpC$  strain,  
297 compared to the  $\Delta mecA$  strain, is consistent with a mechanism where MecA suppresses *comY*  
298 response by sequestering ComX. Fitting the model to the data provides the probability  
299 distribution of the MecA copy number, Figure 6C, where MecA is measured in units of  
300 equivalent  $P_{comX}$  activity. Cell-to-cell variability in MecA copy number is then a source of  
301 variability in *comY* expression.

302

303 *CSP and XIP stimulation produce similar correlations between comX and comY activation*  
304 Previous studies have demonstrated that deletions of *mecA* or *clpCP* enhance *comY* expression  
305 upon stimulation with CSP in complex media (Tian *et al.*, 2013; Dong *et al.*, 2014). Our data  
306 show with single cell resolution that the same deletions also affect the response to XIP in  
307 defined media. These findings raise the question of whether, in the presence of MecA/ClpCP,  
308 the activation of *comY* by ComX may be similar regardless of how *comX* transcription is  
309 induced, whether by XIP or CSP. Figure 7 compares single cell measurements of *comX* and  
310 *comY* activity with CSP and XIP respectively. Precise quantitative comparison of the two  
311 response curves is complicated by the stronger green auto-fluorescence of cells in complex  
312 medium, which shifts the horizontal axis of the CSP data. Further, CSP appears to induce a  
313 slightly noisier *comY* response than does XIP, possibly in connection with feedback behavior in  
314 the ComDE system (Son *et al.*, 2015a). However the data verify a generally similar behavior in  
315 both conditions: *comY* responds in threshold fashion to activation of *comX*, and *comY* activation  
316 is highly heterogeneous in the population, even among cells with the highest *comX* activity.

317

318

## 319 **Discussion**

320 The MecA/ClpCP proteolytic system is well conserved as a negative regulator of genetic  
321 competence across streptococcal groups and in other naturally competent species, including *B.*  
322 *subtilis* (Liu *et al.*, 2013). However, while mechanistic studies of MecA/ClpCP have provided a  
323 clear description of its action, they have not fully resolved the question of how MecA/ClpCP  
324 contributes to competence regulation. Several authors have proposed that MecA/ClpCP serves  
325 either to suppress or terminate the competent state. For *B. subtilis*, Turgay *et al.* proposed that  
326 MecA/ClpCP degradation of the ComK competence regulator provides a ‘timing’ function by  
327 limiting synthesis of the auto-activating ComK regulator, thus permitting escape from the  
328 competent state (Turgay *et al.*, 1998). Dufour *et al.* proposed a similar model for *S. mutans*, in

329 which the sequestration and degradation of free ComX by MecA/ClpCP forces an exit from the  
330 competent state late in growth, when the transcription of *comX* is repressed (Dufour *et al.*,  
331 2016). Wahl *et al.* proposed that *S. salivarius* MecA/ClpCP serves a ‘locking’ function,  
332 preventing the cell from entering the competent state under inappropriate conditions, such as  
333 early in the growth phase (Wahl *et al.*, 2014). Wahl *et al.* argued that at low XIP concentrations  
334 proteolytic degradation of ComX prevents competence, but that high XIP concentrations may  
335 alleviate this repression, possibly by overwhelming the proteolytic capacity or by activating  
336 another, unidentified gene product.

337

338 Both the ‘locking’ and ‘timing’ models interpret MecA/ClpCP as a mechanism for suppressing  
339 activation of *comY* when *comX* expression is weak. Our data are consistent with this  
340 description. Moreover, our data show that this suppression can be described by the simplest  
341 model in which an intracellular pool of MecA intercepts available ComX, sequestering it and  
342 blocking its otherwise straightforward activation of *comY*. Such a model quantitatively fits the  
343 data on the *clpC* mutant, in which MecA can sequester ComX but *clpP* proteolysis is absent. If  
344 the MecA copy number obeys a gamma probability distribution, as is common for bacterial  
345 proteins, then the model reproduces both the average relationship between *comY* and *comX*  
346 expression and the cell-to-cell variability in that expression. Therefore, the response of *comY* in  
347 individual *clpC* and *mecA* cells can be understood solely in terms of the  $P_{comX}$  activity and  
348 MecA copy number distribution. The behavior of the late competence genes in these mutants  
349 can be understood without positing any role for XIP other than as a stimulus for  $P_{comX}$ .

350

351 In addition, our single cell data show that the MecA/ClpCP system substantially enhances the  
352 noise (cell-to-cell heterogeneity) in *comY* expression when *comX* is activated. Even at high XIP  
353 concentrations that saturate *comX* expression, *comY* expression levels within the UA159  
354 population span a range extending three orders of magnitude above the baseline; by contrast,

355 the deletion mutants all express *comY* with far less noise at high XIP concentrations. Our  
356 modeling indicates that cell-to-cell variability in the MecA copy number in wild type cells,  
357 together with the proteolytic action of ClpP (which reduces MecA and ComX copy numbers)  
358 adds to noise that is generated upstream by the pathways that activate *comX*. The resulting  
359 noisy threshold effect is very similar to the toxin/antitoxin competition that generates phenotypic  
360 heterogeneity in bacterial persistence (Rotem *et al.*, 2010), or to a sequestration-induced  
361 threshold model for non-linear gene regulation (Buchler; Cross, 2009).

362

363 A clear understanding of the role of MecA/ClpCP has perhaps been complicated by early  
364 reports that deletion of *mecA* or *clpC* increased transformability or ComX protein levels under  
365 CSP stimulation (in complex medium), but not under XIP stimulation (in defined medium). Our  
366 data confirm in detail that the MecA/ClpCP system affects signaling from *comX* to *comY* in  
367 defined medium. In fact, as the sequestration model described above is indifferent to whether  
368 *comX* is stimulated by exogenous XIP or CSP, we expect that signaling from *comX* to *comY*  
369 should be similar in both CSP/complex medium and in XIP/defined medium. Figure 7 suggests  
370 that the relationship is very similar.

371

372 This finding suggests that the MecA/ClpCP system acts continuously to suppress ComX levels,  
373 regardless of the extracellular inputs driving *comX* expression. A model where MecA/ClpCP  
374 performs this task in relatively steady fashion is consistent with findings that *S. mutans* MecA  
375 and ClpCP protein levels did not differ in complex and defined medium (Dong *et al.*, 2014), that  
376 MecA induction showed little change during *S. suis* competence (Zaccaria *et al.*, 2016), and that  
377 *S. mutans mecA/clpCP* mRNA levels are insensitive to XIP inputs (Supporting Table ST1). Thus  
378 competence will be suppressed when *comX* is weakly expressed due to insufficient CSP or XIP  
379 early in growth ('locking' behavior). Competence will also be suppressed when *comX* is weakly  
380 expressed late in growth due to inefficient CSP/XIP signaling. Falling extracellular pH late in the



381 growth phase suppresses competence signaling by CSP and XIP (Guo *et al.*, 2014; Son *et al.*,  
382 2015b), which may allow MecA/ClpCP to shut down the competent state ('timing behavior').  
383  
384 Consequently the sequestration mechanism can provide both 'timing' and 'locking' functions.  
385 The simulations in Figure 4 and Figure 6 are based on simple equilibrium models that address  
386 only the effects of sequestration by MecA on the pool of free ComX, omitting the kinetic effects  
387 of ClpP unfolding and degradation of ComX and MecA. A model that includes ClpP proteolysis  
388 is much more complicated, as it must include the sequential binding steps that are associated  
389 with the formation of the ternary complex, binding of ClpP, and the breakdown of both MecA  
390 and ComX. The binding and kinetic parameters of the model cannot be determined from our  
391 data; however we can construct a reasonably tractable model for the full system by simplifying  
392 the complex regulatory mechanism that is outlined in the literature (Mei *et al.*, 2009). Supporting  
393 Figure S7 describes a simplified kinetic model that can rationalize some of the observations in  
394 our data, including the finding that deletion of *clpC* or *clpP* did not eliminate the *comX* threshold  
395 that is required for *comY* activation, and that only the *mecA* deletion eliminated the threshold  
396 and sharply reduced the noise in *comY*. Supporting Figure S7 shows that simulations from such  
397 rough models can reproduce key differences in *comX-comY* threshold behavior observed  
398 among the mutants studied here.

399  
400 We note that a MecA copy number distribution that has higher mean but is narrower than that of  
401 Figure 6C would still provide the same 'timing' or 'locking' function without introducing as much  
402 noise in *comY*. The evident width of the distribution therefore suggests that the organism may  
403 benefit from greater noise. The competence pathway in *S. mutans* is linked to several stress-  
404 induced behaviors that are heterogeneous in the population, including competence, lysis and a  
405 persister phenotype (Perry *et al.*, 2009; LeungAjdic *et al.*, 2015; Leung *et al.*, 2015). A link  
406 between quorum controlled behavior and phenotypic heterogeneity has often been noted in



407 bacterial gene regulation. In other organisms, such as *B. subtilis*, complex pathways that  
408 integrate intracellular and extracellular signaling mechanisms with stochastic gene expression  
409 often generate phenotypic heterogeneity, distributing stress response behaviors such as  
410 competence and sporulation among different individuals in the population (Grote *et al.*, 2015).  
411 Interestingly, propidium iodide staining of individual *S. mutans* indicates that *comX*-driven lysis  
412 is decoupled from *comX*-driven competence (Supporting Figure S5). While higher *comX*  
413 expression increases the probability of cell lysis, the most highly expressing cells (which are  
414 more likely to express *comY*) actually show less evidence of lysis. Accordingly, the MecA/ClpCP  
415 system may provide a bet-hedging advantage to an *S. mutans* population by providing an  
416 additional, stochastic switching point in the regulatory pathway from stress conditions to  
417 transformability.

418

419 Our data show that the action of the *S. mutans* MecA/ClpCP system can be quantitatively  
420 understood, at the level of individual cell behavior, within a very simple threshold mechanism.  
421 As the MecA/ClpCP system is widely conserved this finding raises the question of whether  
422 MecA/ClpCP also generates a heterogeneity advantage in other organisms such as *S.*  
423 *pneumoniae*, in which competence regulation is more straightforward and the *comX* bimodality  
424 mechanism is absent. Our data also highlight the long standing question of whether by  
425 combining cooperative behaviors of quorum signaling with deliberately noisy intracellular  
426 phenomena such as MecA and ComRS, *S. mutans* can achieve some form of optimum balance  
427 between socially-driven, environmentally-driven and purely stochastic behavior in competence  
428 regulation.

429

## 430 **Experimental Procedures**

431 *Preparation of reporter strains*

432 *S. mutans* strains and deletion mutants (Table 1) harboring green fluorescent protein (*gfp*)  
433 and/or red fluorescent protein (*rfp*) reporter genes fused to the promoter regions of *comX*  
434 (*PcomX-gfp*) and *comY* (*PcomYA-rfp*) were grown in brain heart infusion medium (BHI; Difco)  
435 at 37°C in a 5% CO<sub>2</sub>, aerobic atmosphere with either spectinomycin (1 mg mL<sup>-1</sup>), erythromycin  
436 (10 µg mL<sup>-1</sup>), or kanamycin (1 mg mL<sup>-1</sup>). *PcomX-gfp* was directly integrated into the  
437 chromosome of *S. mutans* (denoted XG) by amplifying a 0.2-kbp region comprising *PcomX*  
438 using primers that incorporated *Xba*I and *Spe*I sites (Table 2). This was fused to a *gfp* gene that  
439 had been amplified with primers engineered to contain *Spe*I and *Xba*I sites from the plasmid  
440 pCM11 (Lauderdale *et al.*, 2010; Son *et al.*, 2012), and inserted into the *Xba*I site on pBGE  
441 (Zeng; Burne, 2009). *PcomYA-rfp* was constructed in shuttle vector pDL278 (LeBlanc *et al.*,  
442 1992) by amplification of a 0.2-kbp region containing *PcomY* with *Hind*III and *Spe*I site-  
443 containing primers and fusing with the *rfp* gene reporter fragment amplified from plasmid pRFP  
444 (Bose *et al.*, 2013), using primers that incorporated *Spe*I and *Eco*RI sites. The ligation mixtures  
445 were transformed into competent *S. mutans* (strain designated YR) and into the XG strain  
446 (denoted XG&YR). Additionally, to study the role of *MecA*/*ClpCP* on *PcomY* expression, both  
447 the XG integration vector and the YR shuttle vector were transformed into strains harboring non-  
448 polar (NPKmR) antibiotic resistance cassette replacements of *mecA* (this study), *clpC* or *clpP*  
449 (J. A. C. Lemos; Burne, 2002). Plasmid DNA was isolated from *Escherichia coli* using a  
450 QIAGEN (Chatsworth, Calif.) Plasmid Miniprep Kit. Restriction and DNA-modifying enzymes  
451 were obtained from Invitrogen (Gaithersburg, Md.) or New England Biolabs (Beverly, Mass.).  
452 PCRs were carried out with 100 ng of chromosomal DNA using Taq DNA polymerase. PCR  
453 products were purified with the QIAquick kit (QIAGEN). DNA was introduced into *S. mutans* by  
454 natural transformation and into *E. coli* by the calcium chloride method (Cosloy; Oishi, 1973).  
455  
456 *Competence Peptides*

457 Synthetic CSP (sCSP, aa sequence = SGSLSTFFRLFNRSFTQA), corresponding to the mature  
458 18 aa peptide (Hossain; Biswas, 2012) was synthesized by the Interdisciplinary Center for  
459 Biotechnology Research (ICBR) facility at the University of Florida and its purity (95%) was  
460 confirmed by high performance liquid chromatography (HPLC). sCSP was reconstituted in water  
461 to a final concentration of 2 mM and stored in 100  $\mu$ L aliquots at -20°C. Synthetic XIP (sXIP, aa  
462 sequence = GLDWWSL), corresponding to residues 11-17 of ComS, was synthesized and  
463 purified to 96% homogeneity by NeoBioSci (Cambridge, MA). The lyophilized sXIP was  
464 reconstituted with 99.7% dimethyl sulfoxide (DMSO) to a final concentration of 2 mM and stored  
465 in 100  $\mu$ L aliquots at -20°C.

466

#### 467 *Microfluidic mixer design and fabrication*

468 Microfluidic devices were fabricated by the soft lithography method of molding a transparent  
469 silicon elastomer (polydimethylsiloxane) on a silicon master (Sia; Whitesides, 2003). The master  
470 was made from a silicon wafer through conventional photolithographic processing. Details of the  
471 fabrication method and the devices were described previously (Jeon *et al.*, 2000; Son *et al.*,  
472 2012; Son *et al.*, 2015b). Our microfluidic device consisted of nine parallel flow chambers (each  
473 15  $\mu$ m deep and 400  $\mu$ m wide), as shown in Supporting Figure S1. Three inlet channels  
474 supplied media containing different concentrations of signal peptides, delivered by syringe  
475 pumps into the device. The design has a mixing network that generates nine streams containing  
476 different admixtures of the three input solutions. These streams flow through the nine cell  
477 chambers in which *S. mutans* are adhered to the lower, glass window. The device also has two  
478 side channels: one for the control of fluid inside the device and the other for injection of different  
479 solutions into the cell chambers. Two-layer lithography allows air-pressure control of these side  
480 channels during cell loading and injection of different solutions (Unger *et al.*, 2000).

481

#### 482 *Microfluidic experiments*

483 Overnight cultures grown in BHI with antibiotic selection were washed and diluted 20-fold in  
484 fresh medium, which was either chemically defined medium (FMC) (Terleckyj *et al.*, 1975; De  
485 Furio *et al.*, 2017) or a complex medium that consisted of 1/3 of BHI (BD) and 2/3 of FMC by  
486 volume. Cultures were then incubated at 37°C in a 5% CO<sub>2</sub>, aerobic atmosphere. When OD<sub>600</sub>  
487 reached 0.1 - 0.2, cells were sonicated at 30% amplitude for 10 sec (Fisher FB120) to separate  
488 cell chains and then loaded into the microfluidic device. Each cell chamber was continuously  
489 perfused with fresh medium containing different amounts of synthetic XIP (0 - 2 µM) or synthetic  
490 CSP (0 - 1 µM). The XIP or CSP concentration in each flow channel was generated by the  
491 mixture of three different inlet media in the mixing network in the device. A trace amount (0 - 10  
492 ng/mL) of far-red fluorescent dye (Alexa Fluor 647) was added to each of the three inlet media  
493 in proportion to its signal molecule concentration, so that the concentration of signal molecule in  
494 each chamber could be calculated. After 2.5 h of incubation time, fresh medium containing 100  
495 µg mL<sup>-1</sup> of rifampicin was flowed through all cell chambers to halt GFP and RFP translation. Cell  
496 chambers were then incubated an additional 3 h to allow the full maturation of RFP. Cells were  
497 imaged in phase contrast and in green and red fluorescence using an inverted microscope  
498 (Nikon TE2000U) equipped with a computer controlled motorized stage and cooled CCD  
499 camera.

500

#### 501 *Single cell image analysis*

502 Custom Matlab software was used to analyze the expression of the *gfp* and *rfp* reporters in  
503 individual cells from overlaid phase contrast, GFP, and RFP images (Kwak *et al.*, 2012). The  
504 software first segments individual cells from the cell chain based on the phase contrast image,  
505 then finds the concentration of GFP and RFP by correlating the intensity of the phase contrast  
506 image with its GFP and RFP fluorescence intensity. This gives a unitless parameter (denoted *R*)  
507 that is proportional to the intracellular concentration of GFP or RFP. The GFP or RFP

508 expression levels shown in the data figures are the *R*-values for green or red cell fluorescence  
509 respectively.

510

#### 511 *Transformation efficiency*

512 Overnight cultures of selected strains were diluted 1:20 into 200  $\mu$ L of FMC medium in  
513 polystyrene microtiter plates. Cells were grown to  $OD_{600} = 0.15$  in a 5%  $CO_2$  atmosphere. When  
514 desired, 300, 500 or 1000 nM of sXIP was added and cells were incubated for 10 min. Then  
515 0.5  $\mu$ g of purified plasmid pIB184, which harbors an erythromycin resistance ( $Erm^R$ ) gene, was  
516 added to the culture. Following 2.5 h incubation at 37°C, transformants and total CFU were  
517 enumerated by plating appropriate dilutions on BHI agar plates with and without the addition of  
518 1 mg  $mL^{-1}$  erythromycin, respectively. CFU were counted after 48 h of incubation.

519 Transformation efficiency was expressed as the percentage of transformants among the total  
520 viable cells. The data presented are averages of two independent experiments that each  
521 included three biological replicates.

522

#### 523 *mRNA levels for mecA, clpCP, and com genes*

524 Data for the analysis of relative mRNA levels for *mecA*, *clpCP* and *com* genes was taken from  
525 RNA-Seq analysis completed on strain UA159 (Kaspar *et al* 2018, in preparation). The wild-type  
526 strain was grown in FMC medium to  $OD_{600} = 0.2$ , at which time either a final concentration of  
527 2  $\mu$ M XIP or vehicle control (1% DMSO) was added. The strains were then allowed to grow to  
528 mid-exponential phase ( $OD_{600} = 0.5$ ) before harvesting. From the analyzed RNA-Seq data, total  
529 read counts for each selected gene were found from three biological replicates and RPKM  
530 (reads per kilobase per million) calculated under each condition. Finally, ratios for mRNA levels  
531 were found by using the normalized RPKM data and by setting *mecA* levels to 1.0. The data  
532 files used in this study are available from NCBI-GEO (Gene Expression Omnibus) under  
533 accession no. GSE110167.

534

535 *Stochastic model for MecA regulation of comX*

536 We used the gamma statistical distribution to model cell-to-cell variability (noise) in the  
537 activation of *comY* by ComX and the effect of the MecA/ClpCP system. Heterogeneity in  
538 bacterial protein copy number can be well-described by a physical model of transcription and  
539 translation as consecutive stochastic (Poisson) processes, characterized by rates  $k_r$  (transcripts  
540 per unit time) and  $k_p$  (protein copies per transcript per unit time), respectively (Friedman *et al.*,  
541 2006; Taniguchi *et al.*, 2010). In this model the protein copy number  $n$  in each cell is a random  
542 variable drawn from a gamma distribution  $\Gamma(n | A, B)$ . The two parameters  $A$  and  $B$  that  
543 determine the shape of the distribution are related to  $k_r$  and  $k_p$ , respectively (and to the mRNA  
544 and protein lifetimes) (Friedman *et al.*, 2006). Gamma distribution fits to our *PcomY* reporter  
545 data are shown in Supporting Figure S2.

546

547 To model ComX activation of *comY* in the *mecA* deletion mutant (lacking post-translational  
548 regulation by MecA/ClpCP), we applied a simple quantitative model in which the *PcomX* activity  
549 of each cell, as reported by GFP fluorescence, determines the gamma distribution for its *PcomY*  
550 activity, measured by RFP fluorescence. Specifically, the *PcomY-rfp* reporter fluorescence  $Y$  of  
551 a cell is a random number drawn from a gamma distribution  $\Gamma(Y | A, B)$ , for which the  
552 parameters are

553

$$554 \quad A = a_1 X / (X + a_2)$$

$$555 \quad B = b_1 X / (X + b_2)$$

556

557 Here,  $X$  is the *PcomX-gfp* reporter fluorescence of that cell. Thus  $Y$  is directly activated by  $X$  in a  
558 saturating but noisy fashion. We fit this model to a dataset of individual cell RFP and GFP  
559 fluorescence values collected on dual reporter (*PcomX-gfp*, *PcomY-rfp*)  $\Delta$ *mecA* cells that were

560 supplied with different concentrations of synthetic XIP (defined medium) and then imaged on  
561 glass slides. Maximum likelihood analysis gives the four model parameters  $a_1$ ,  $a_2$ ,  $b_1$ ,  $b_2$  for the  
562  $\Delta mecA$  strain as follows: We start with the experimental  $P_{comX}$  activity measured for each cell,  
563 then use the four parameters to define a  $P_{comY}$  gamma distribution for that cell. We find the  
564 probability of that cell's actual  $P_{comY}$  activity, given that gamma distribution. The parameter  
565 values are then adjusted to maximize the likelihood of the total dataset. (The optimal values are  
566 given in Supporting Figure 3.) Given these model parameters we then generate a model  
567 simulation for comparison against the data as follows: We use the parameters and the  
568 experimental  $P_{comX}$  activity of each cell to generate its  $P_{comY}$  gamma distribution, draw a  
569 random number from that distribution to obtain a simulated  $P_{comY}$  activity for the cell, and then  
570 plot the resulting simulated  $P_{comY}$  vs  $P_{comX}$  values for all cells.

571

572 We also tested an alternative model in which environmental XIP concentration, rather than  
573  $P_{comX}$  activity of a cell, is the determinant of that cell's  $P_{comY}$  activity. In this model  $X$  in the  
574 above equations refers to the XIP concentration supplied to a cell. Again, using maximum  
575 likelihood, we found the parameters ( $a_1$ ,  $a_2$ ,  $b_1$ ,  $b_2$ ) that gave best agreement with the  $\Delta mecA$   
576 data in this alternative model. The scatterplot of Supporting Figure S3, generated by the above  
577 simulation procedure, compares the simulated  $P_{comY}$  to the experimental  $P_{comY}$  for the  
578  $\Delta mecA$  data.

579

580 For the dual-reporter  $\Delta c/pC$  mutant, we extended the above model by allowing MecA to  
581 sequester, but not degrade ComX. For simplicity we assume that (i) MecA and ComX bind with  
582 sufficiently high affinity that a cell can only activate  $comY$  to the extent that its ComX copy  
583 number exceeds its number of MecA copies, leaving some available ComX; ii) The activation of  
584  $comY$  by the available ComX is as described in the  $\Delta mecA$  model above (and with the same  
585 parameters); (iii) the MecA copy number  $M$  in a cell is a stochastic variable drawn from a

586 gamma distribution  $\Gamma(M | A, B)$  whose  $A$  and  $B$  parameters are fixed, independent of XIP  
587 concentration. If  $X$  is the  $P_{comX-gfp}$  activity of a given cell, then  $X' = X - M$  is the amount of  
588 ComX available after sequestration by MecA. Given a GFP measurement of  $X$  for a cell, the  
589 MecA gamma distribution  $\Gamma(M = X - X' | A, B)$  determines the probability that  $X'$  copies of ComX  
590 are available to activate  $comY$ . This  $X'$  determines the probability distribution for  $Y$  (the  $P_{comY-}$   
591  $rfp$  response) by the above model. Averaging over the MecA distribution then gives a prediction  
592 for both the average behavior and cell-to-cell variability in the dependence of  $P_{comY-rfp}$  on  
593  $P_{comX-gfp}$ , in the presence of MecA.

594  
595 Taking the  $P_{comY-rfp}$  activation parameters obtained in the  $\Delta mecA$  fit, we therefore analyzed  
596 individual cell  $P_{comX}/P_{comY}$  data that was collected on  $\Delta clpC$  cells that were supplied with  
597 different XIP concentrations and imaged on glass slides. We then found the  $A$  and  $B$  values for  
598 the MecA distribution that maximize the likelihood of the  $P_{comX}/P_{comY}$  dataset, given the  
599 sequestration model. Using those parameters, we then generated a simulation of the  $P_{comY}$   
600 versus  $P_{comX}$  activity. We compared these results to the experimental data for the  $\Delta clpC$   
601 strain. In plotting the simulation, we modelled the weak red auto-fluorescence background in the  
602 data by adding baseline Gaussian noise of  $3 \pm 0.8$  red fluorescence units; this baseline is small  
603 compared to the typical red fluorescence ( $\sim 10^2$ - $10^4$  units) of  $comY$  activated cells.

604

605

## 606 **Acknowledgments**

607

608 This work was supported by 1R01 DE023339 and T90 DE021990 from the National Institute of  
609 Dental and Craniofacial Research.

610

611



612

## References

- 613 Biornstad, T.J., and Havarstein, L.S. (2011) ClpC acts as a negative regulator of competence in  
614 *Streptococcus thermophilus*. *Microbiology* **157**: 1676-1684.
- 615 Bose, J.L., Fey, P.D., and Bayles, K.W. (2013) Genetic Tools To Enhance the Study of Gene  
616 Function and Regulation in *Staphylococcus aureus*. *Applied and Environmental Microbiology*  
617 **79**: 2218-2224.
- 618 Boutry, C., Wahl, A., Delplace, B., Clippe, A., Fontaine, L., and Hols, P. (2012) Adaptor Protein  
619 MecA Is a Negative Regulator of the Expression of Late Competence Genes in *Streptococcus*  
620 *thermophilus*. *Journal of Bacteriology* **194**: 1777-1788.
- 621 Buchler, N.E., and Cross, F.R. (2009) Protein sequestration generates a flexible ultrasensitive  
622 response in a genetic network. *Molec Syst Biol* **5**: 272-272.
- 623 Cosloy, S.D., and Oishi, M. (1973) Genetic Transformation in *Escherichia coli* K12. *Proc Natl*  
624 *Acad Sci U S A* **70**: 84-87.
- 625 De Furio, M., Ahn, S.J., Burne, R.A., and Hagen, S.J. (2017) Oxidative stressors modify the  
626 response of *Streptococcus mutans* to its competence signal peptides. *Appl Environ Microbiol*  
627 **83**: e01345-17.
- 628 Dong, G., Tian, X., Gomez, Z.A., and Li, Y. (2014) Regulated proteolysis of the alternative  
629 sigma factor SigX in *Streptococcus mutans*: implication in the escape from competence. *Appl*  
630 *Environ Microb* **14**: 183.
- 631 Dufour, D., Villemin, C., Perry, J.A., and Lévesque, C.M. (2016) Escape from the competence  
632 state in *Streptococcus mutans* is governed by the bacterial population density. *Molec Oral*  
633 *Microbiol* **31**: 501-514.
- 634 Fontaine, L., Wahl, A., Fléchar, M., Mignolet, J., and Hols, P. (2014) Regulation of competence  
635 for natural transformation in streptococci. *Infect Genet Evol* **33**: 343-360.
- 636 Friedman, N., Cai, L., and Xie, X.S. (2006) Linking Stochastic Dynamics to Population  
637 Distribution: An Analytical Framework of Gene Expression. *Phys Rev Lett* **97**: 168302.
- 638 Grote, J., Krysciak, D., and Streit, W.R. (2015) Phenotypic Heterogeneity, a Phenomenon That  
639 May Explain Why Quorum Sensing Does Not Always Result in Truly Homogenous Cell  
640 Behavior. *Applied and Environmental Microbiology* **81**: 5280-5289.
- 641 Guo, Q., Ahn, S., Kaspar, J., Zhou, X., and Burne, R.A. (2014) Growth phase and pH influence  
642 peptide signaling for competence development in *Streptococcus mutans*. *J Bacteriol* **196**: 227-  
643 36.
- 644 Hagen, S.J., and Son, M. (2017) Origins of heterogeneity in *Streptococcus mutans* competence:  
645 interpreting an environment-sensitive signaling pathway. *Phys Biol* **14**: 015001.

- 646 Hossain, M.S., and Biswas, I. (2012) An extracellular protease, SepM, generates functional  
647 competence-stimulating peptide in *Streptococcus mutans* UA159. *J Bacteriol* **194**: 5886-5896.
- 648 Inobe, T., and Matouschek, A. (2008) Protein targeting to ATP-dependent proteases. *Curr Opin*  
649 *Struct Biol* **18**: 43-51.
- 650 Jeon, N.L., Dertinger, S.K.W., Chiu, D.T., Choi, I.S., Stroock, A.D., and Whitesides, G.M. (2000)  
651 Generation of solution and surface gradients using microfluidic systems. *Langmuir* **16**: 8311-  
652 8316.
- 653 Johnston, C., Martin, B., Fichant, G., Polard, P., and Claverys, J. (2014) Bacterial  
654 transformation: distribution, shared mechanisms and divergent control. *Nat Rev Micro* **12**: 181-  
655 196.
- 656 Kwak, I.H., Son, M., and Hagen, S.J. (2012) Analysis of gene expression levels in individual  
657 bacterial cells without image segmentation. *Biochem Biophys Res Commun* **421**: 425-430.
- 658 Lauderdale, K.J., Malone, C.L., Boles, B.R., Morcuende, J., and Horswill, A.R. (2010) Biofilm  
659 dispersal of community-associated methicillin-resistant *Staphylococcus aureus* on orthopedic  
660 implant material. *J Orthop Res* **28**: 55-61.
- 661 LeBlanc, D.J., Lee, L.N., and Abu-Al-Jaibat, A. (1992) Molecular, genetic, and functional  
662 analysis of the basic replicon of pVA380-1, a plasmid of oral streptococcal origin. *Plasmid* **28**:  
663 130-145.
- 664 Lemme, A., Grobe, L., Reck, M., Tomasch, J., and Wagner-Dobler, I. (2011) Subpopulation-  
665 specific transcriptome analysis of competence-stimulating-peptide-induced *Streptococcus*  
666 *mutans*. *J Bacteriol* **193**: 1863-1877.
- 667 Lemos, J.A.C., and Burne, R.A. (2002) Regulation and Physiological Significance of ClpC and  
668 ClpP in *Streptococcus mutans*. *Journal of Bacteriology* **184**: 6357-6366.
- 669 Lemos, J.A., and Burne, R.A. (2008) A model of efficiency: stress tolerance by *Streptococcus*  
670 *mutans* **154**: 3247-3255.
- 671 Leung, V., Ajdic, D., Koyanagi, S., and Lévesque, C.M. (2015) The Formation of *Streptococcus*  
672 *mutans* Persists Induced by the Quorum-Sensing Peptide Pheromone Is Affected by the LexA  
673 Regulator. *Journal of Bacteriology* **197**: 1083-1094.
- 674 Leung, V., Dufour, D., and Levesque, C.,M. (2015) Death and survival in *Streptococcus mutans*:  
675 differing outcomes of a quorum-sensing signaling peptide. *Front Microbiol* **6**: 1176.
- 676 Li, Y.H., and Tian, X. (2017) Proteolytic Regulation of Competence Development in the Genus  
677 *Streptococcus*: Implications in Competence, Stress Response and Antibacterial Therapy. -  
678 *Journal of Antimicrobial Agents* **3**: 148.
- 679 Li, Y., Lau, P., Lee, J., Ellen, R., and Cvitkovitch, D. (2001) Natural genetic transformation of  
680 *Streptococcus mutans* growing in biofilms. *J Bacteriol* **183**: 897-908.

- 681 Liu, J., Mei, Z., Li, N., Qi, Y., Xu, Y., Shi, Y., *et al.* (2013) Structural Dynamics of the MecA-ClpC  
682 Complex: A Type II AAA+ Protein Unfolding Machine. *Journal of Biological Chemistry* **288**:  
683 17597-17608.
- 684 Mashburn-Warren, L., Morrison, D.A., and Federle, M.J. (2010) A novel double-tryptophan  
685 peptide pheromone controls competence in *Streptococcus* spp. via an Rgg regulator. *Mol*  
686 *Microbiol* **78**: 589-606.
- 687 Mei, Z., Wang, F., Qi, Y., Zhou, Z., Hu, Q., Li, H., *et al.* (2009) Molecular Determinants of MecA  
688 as a Degradation Tag for the ClpCP Protease. *Journal of Biological Chemistry* **284**: 34366-  
689 34375.
- 690 Merritt, J., Qi, F., and Shi, W. (2005) A unique nine-gene *comY* operon in *Streptococcus*  
691 *mutans*. *Microbiology* **151**: 157-166.
- 692 Perry, J.A., Cvitkovitch, D.G., and Levesque, C.M. (2009) Cell death in *Streptococcus mutans*  
693 biofilms: a link between CSP and extracellular DNA. *FEMS Microbiol Lett* **299**: 261-266.
- 694 Reck, M., Tomasch, J., and Wagner-Döbler, I. (2015) The Alternative Sigma Factor SigX  
695 Controls Bacteriocin Synthesis and Competence, the Two Quorum Sensing Regulated Traits in  
696 *Streptococcus mutans*. *PLoS Genet* **11**: e1005353.
- 697 Rotem, E., Loinger, A., Ronin, I., Levin-Reisman, I., Gabay, C., Shoshitashvili, N., *et al.* (2010)  
698 Regulation of phenotypic variability by a threshold-based mechanism underlies bacterial  
699 persistence. *Proceedings of the National Academy of Sciences* **107**: 12541-12546.
- 700 Seaton, K., Ahn, S., Sagstetter, A.M., and Burne, R.A. (2011) A transcriptional regulator and  
701 ABC transporters link stress tolerance, (p)ppGpp, and genetic competence in *Streptococcus*  
702 *mutans*. *J Bacteriol* **193**: 862-874.
- 703 Shanker, E., and Federle, M.J. (2016) Quorum sensing regulation of competence and  
704 bacteriocins in *Streptococcus pneumoniae* and *mutans* **8**: 15.
- 705 Shields, R.C., and Burne, R.A. (2016) Growth of *Streptococcus mutans* in Biofilms Alters  
706 Peptide Signaling at the Sub-population Level. *Front Microbiol* **7**: 1075.
- 707 Sia, S.K., and Whitesides, G.M. (2003) Microfluidic devices fabricated in poly(dimethylsiloxane)  
708 for biological studies. *Electrophoresis* **24**: 3563-3576.
- 709 Smith, E.G., and Spatafora, G.A. (2012) Gene Regulation in *S. mutans*. *J Dent Res* **91**: 133-  
710 141.
- 711 Son, M., Shields, R., Ahn, S.J., Burne, R.A., and Hagen, S.J. (2015a) Bidirectional signaling in  
712 the competence regulatory pathway of *Streptococcus mutans*. *FEMS Microbiol Lett* **362**: fmv159.
- 713 Son, M., Ahn, S., Guo, Q., Burne, R.A., and Hagen, S.J. (2012) Microfluidic study of  
714 competence regulation in *Streptococcus mutans*: environmental inputs modulate bimodal and  
715 unimodal expression of *comX*. *Mol Microbiol* **86**: 258-272.

- 716 Son, M., Ghoreishi, D., Ahn, S., Burne, R.A., and Hagen, S.J. (2015b) Sharply tuned pH  
717 response of genetic competence regulation in *Streptococcus mutans*: A microfluidic study of  
718 environmental sensitivity of *comX*. *Appl Environ Microb* **81**: 5622-5631.
- 719 Taniguchi, Y., Choi, P.J., Li, G., Chen, H., Babu, M., Hearn, J., *et al.* (2010) Quantifying *E. coli*  
720 Proteome and Transcriptome with Single-Molecule Sensitivity in Single Cells. *Science* **329**: 533-  
721 538.
- 722 Terleckyj, B., Willett, N.P., and Shockman, G.D. (1975) Growth of several cariogenic strains of  
723 oral streptococci in a chemically defined medium. *Infect Immun* **11**: 649-655.
- 724 Tian, X., Dong, G., Liu, T., Gomez, Z.A., Wahl, A., Hols, P., and Li, Y. (2013) MecA protein acts  
725 as a negative regulator of genetic competence in *Streptococcus mutans*. *J Bacteriol* **195**: 5196-  
726 5206.
- 727 Turgay, K., Hahn, J., Burghoorn, J., and Dubnau, D. (1998) Competence in *Bacillus subtilis* is  
728 controlled by regulated proteolysis of a transcription factor. *EMBO J* **17**: 6730-6738.
- 729 Unger, M.A., Chou, H.P., Thorsen, T., Scherer, A., and Quake, S.R. (2000) Monolithic  
730 microfabricated valves and pumps by multilayer soft lithography. *Science* **288**: 113-116.
- 731 Wahl, A., Servais, F., Drucbert, A., Foulon, C., Fontaine, L., and Hols, P. (2014) Control of  
732 Natural Transformation in Salivarius Streptococci through Specific Degradation of sigma-X by  
733 the MecA-ClpCP Protease Complex. *J Bacteriol* **196**: 2807-2816.
- 734 Zaccaria, E., Wels, M., van Baarlen, P., and Wells, J.M. (2016) Temporal Regulation of the  
735 Transformasome and Competence Development in *Streptococcus suis*. *Front Microbiol* **7**: 1922.
- 736 Zeng, L., and Burne, R.A. (2009) Transcriptional Regulation of the Cellobiose Operon of  
737 *Streptococcus mutans*. *Journal of Bacteriology* **191**: 2153-2162.
- 738

739 **Tables**

740

| <i>S. mutans</i> strains    | Characteristic(s)                                              | Source      |
|-----------------------------|----------------------------------------------------------------|-------------|
| WT (UA159)                  | <i>S. mutans</i> wild-type strain                              | ATCC 700610 |
| XG                          | $P_{comX}$ - <i>gfp</i> integrated into UA159, Em <sup>r</sup> | This study  |
| YR                          | UA159 harboring $P_{comY}$ - <i>rfp</i> , Em <sup>r</sup>      | This study  |
| XG&YR                       | XG harboring $P_{comY}$ - <i>rfp</i> , Sp <sup>r</sup>         | This study  |
| XG&YR& $\Delta$ <i>mecA</i> | $\Delta$ <i>mecA</i> ::NPKm <sup>r</sup> into XG&YR            | This study  |
| XG&YR& $\Delta$ <i>clpC</i> | $\Delta$ <i>clpC</i> ::NPKm <sup>r</sup> into XG&YR            | This study  |
| XG&YR& $\Delta$ <i>clpP</i> | $\Delta$ <i>clpP</i> ::NPKm <sup>r</sup> into XG&YR            | This study  |

741 **Table 1:** Strains used in this study. Em<sup>r</sup>, erythromycin; NPKm<sup>r</sup>, non-polar kanamycin; Sp<sup>r</sup>,  
742 spectinomycin.

743

744

| Primer                         | Nucleotide Sequence (5' – 3')                                   |
|--------------------------------|-----------------------------------------------------------------|
| <i>PcomX</i> -XbaI-FW          | GGA <u>TCT AGA</u> CCA ATT TCA AAT AAT G                        |
| <i>PcomX</i> -SpeI-RV          | CTT <u>CAC TAG</u> TCT ATT ACG ATG ACC                          |
| <i>PcomY</i> -HindIII-FW       | ACA <u>AAG CTT</u> AAA CAA AAT GAT ACC C                        |
| <i>PcomY</i> -SpeI-RV          | TCG <u>ACT AGT</u> CCA GGA AAA AAT TAG                          |
| <i>rfp</i> -SpeI-FW            | <u>GAC TAG</u> TTG ATT AAC TTT ATA AGG AGG AAA<br>AAC ATA TGG A |
| <i>rfp</i> -EcoRI-RV           | CGG <u>AAT TCT</u> TAT AAA AAC AAA TGA TGA CGA<br>CCT TCT GTA C |
| $\Delta$ <i>mecA</i> -FW       | GAT GAC TGG CTG GAT GCA CA                                      |
| $\Delta$ <i>mecA</i> -BamHI-FW | TTT <u>GGA TCC</u> CAT AGT CTT TAC CTC A                        |
| $\Delta$ <i>mecA</i> -BamHI-RV | ATG <u>GGA TCC</u> TAA GCT AGA TGA TAC C                        |
| $\Delta$ <i>mecA</i> -RV       | CCA AAC CAT CCA AAC CAT CAA                                     |

745 **Table 2:** Primers used in this study. Underline of nucleotide sequence denotes respective  
746 restriction enzyme site.

747

748

749 **Figure Legends**

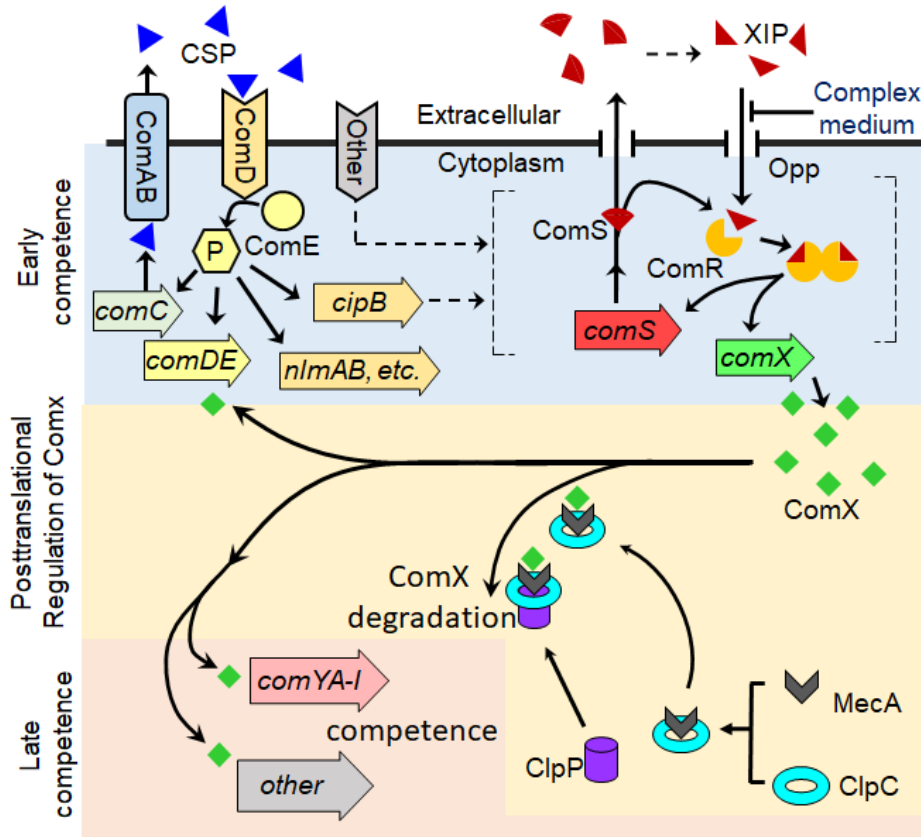

750

751 **Figure 1**

752 *Streptococcus mutans* regulates genetic competence through multiple layers of control (Smith;  
 753 Spatafora, 2012; Tian *et al.*, 2013; Shanker; Federle, 2016). Two quorum signals (CSP and  
 754 XIP), together with other environmental inputs, drive the master competence regulator ComX,  
 755 which is post-translationally regulated by the Meca/ClpCP proteolytic system. The peptide CSP  
 756 (competence stimulating peptide) is detected by the ComDE two component system, leading to  
 757 phosphorylation of the response regulator ComE, which activates transcription of bacteriocin  
 758 genes such as *cipB*. Through a pathway not yet understood, activation of *cipB* is integrated with  
 759 other environmental cues to stimulate the ComRS system, which is the immediate regulator of  
 760 *comX*. ComX, also called SigX, is an alternative sigma factor that directly controls the nine-gene  
 761 operon *comYA-I* and other genes required for transformation. The ComRS system includes the  
 762 peptide ComS and the cytosolic receptor ComR. ComS is the precursor for the quorum-sensing

763 peptide XIP (SigX-inducing peptide). In defined growth medium (lacking assorted small  
764 peptides), extracellular XIP is imported by the Ami/Opp permease and interacts with ComR to  
765 form a transcriptional activator for both *comS* and *comX*. As a result *comX* is uniformly  
766 (population-wide) activated in defined media containing XIP. In complex media, which are rich in  
767 assorted small peptides, extracellular XIP does not activate *comS* and *comX*; in this case XIP  
768 (or possibly its precursor ComS) is proposed to interact with ComR intracellularly, so that both  
769 *comS* and *comX* are driven by the bistable, intracellular transcriptional feedback loop involving  
770 *comS* and the ComRS complex (Son *et al.*, 2012). As a result *comX* is heterogeneously  
771 (bimodal in population) activated in complex media. The MecA/ClpCP system provides  
772 posttranslational regulation of ComX: The adapter protein MecA interacts with ClpC to target  
773 ComX for degradation by the protease ClpP.  
774



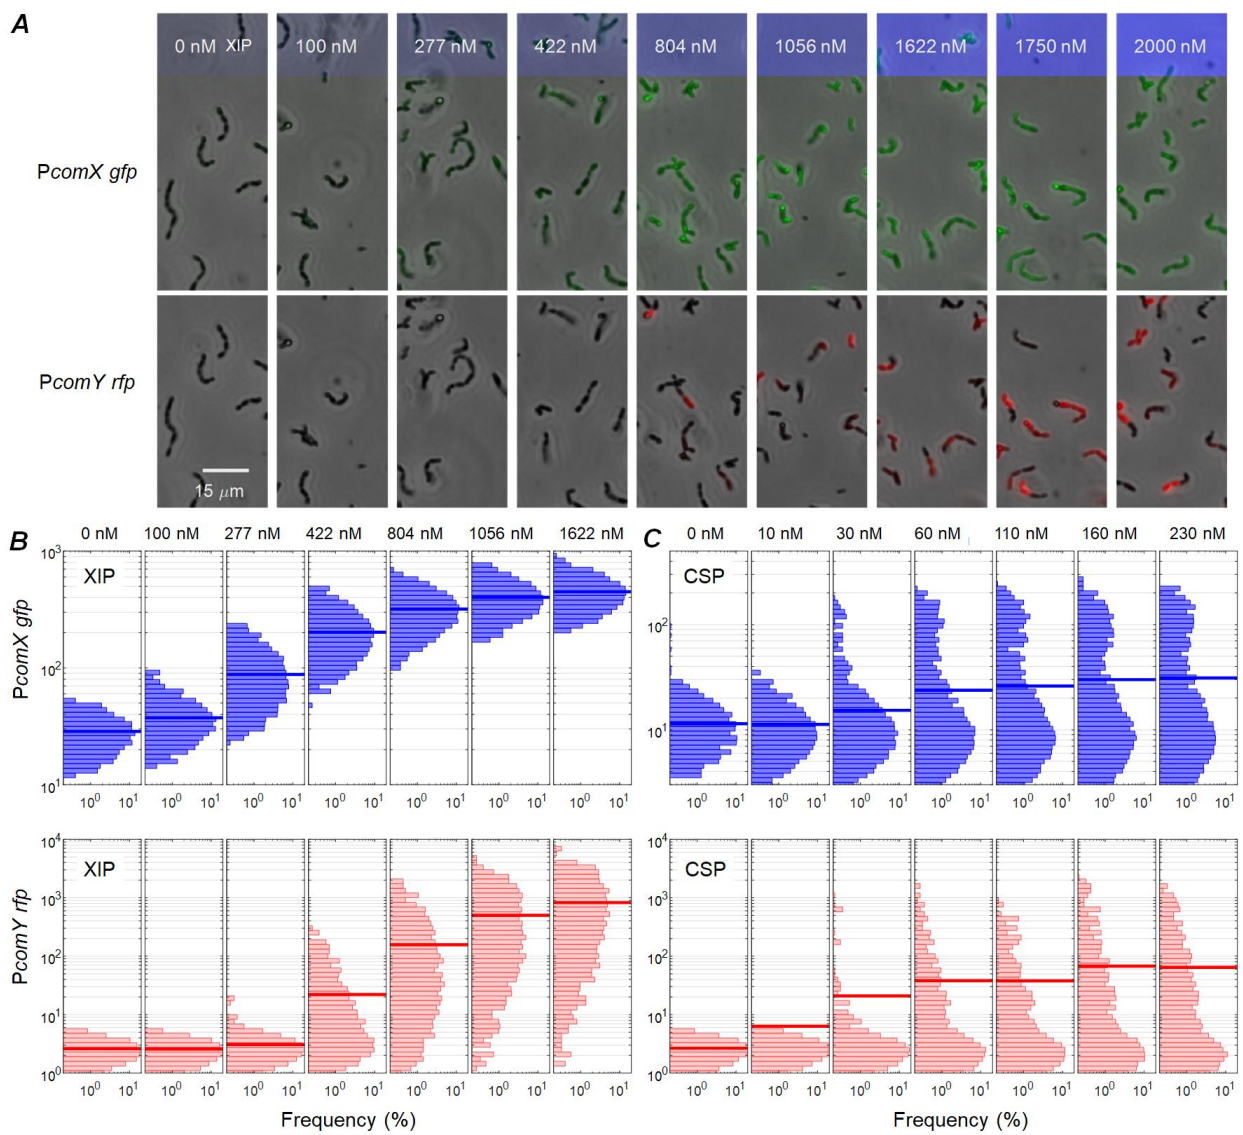

775

776

777 **Figure 2**

778 (A) Microscopy images of dual reporter (*PcomX-gfp* and *PcomY-rfp*) UA159 *S. mutans* growing  
779 in microfluidic channels. Cells were supplied with the indicated concentrations of synthetic XIP  
780 by a continuous flow of defined medium. Phase contrast images (grayscale) are overlaid with  
781 fluorescence images showing *PcomX* (GFP, upper) and *PcomY* (RFP, lower) activity.  
782 (B)-(C) Histograms of *comX* (upper row) and *comY* (lower row) expression in dual reporter  
783 UA159 *S. mutans* under two different modes of stimulation. Cells growing in microfluidic

784 channels were supplied with a continuous flow of (B) defined medium containing XIP, or (C)  
785 complex medium containing CSP, and were imaged in red (for *P<sub>comY</sub>*) and green (for *P<sub>comX</sub>*)  
786 fluorescence. XIP and CSP concentrations are indicated along the top of the figures. The length  
787 of each horizontal histogram bar indicates the percentage of cells that express at the level  
788 indicated. All axes are logarithmic. The thick blue or red bar in each histogram shows the  
789 population mean.  
790

791

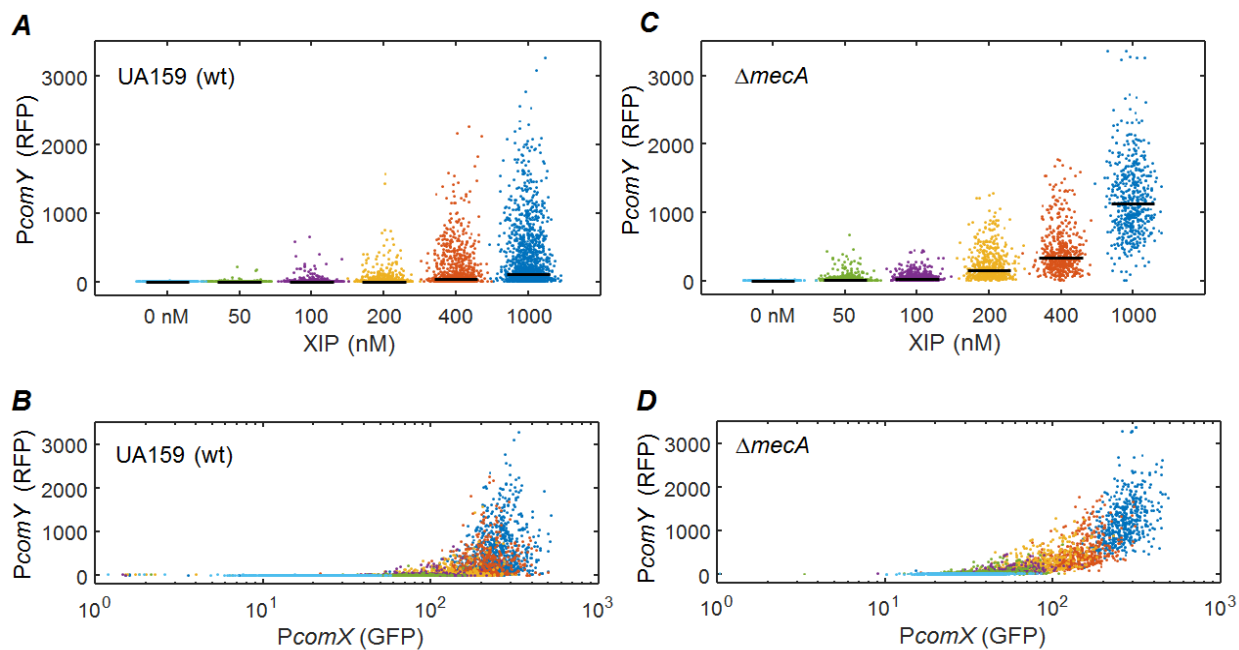

792

### 793 **Figure 3**

794 Comparison of noise in *comY* activation by XIP in (A)-(B) UA159 (wild type) and (C)-(D)  $\Delta mecA$   
795 deletion strain of *S. mutans*. Each point shows the RFP fluorescence of one cell that was  
796 incubated with XIP at the indicated concentration and then imaged on a glass slide. (A) and (C)  
797 show the dependence of *comY* expression on XIP stimulus in the two strains. The horizontal bar  
798 indicates the median expression. (B) and (D) show the correlation between *comY* and *comX*  
799 expression within individual cells, with the point colors indicating the XIP concentration in the  
800 same color code as (A) and (C).

801

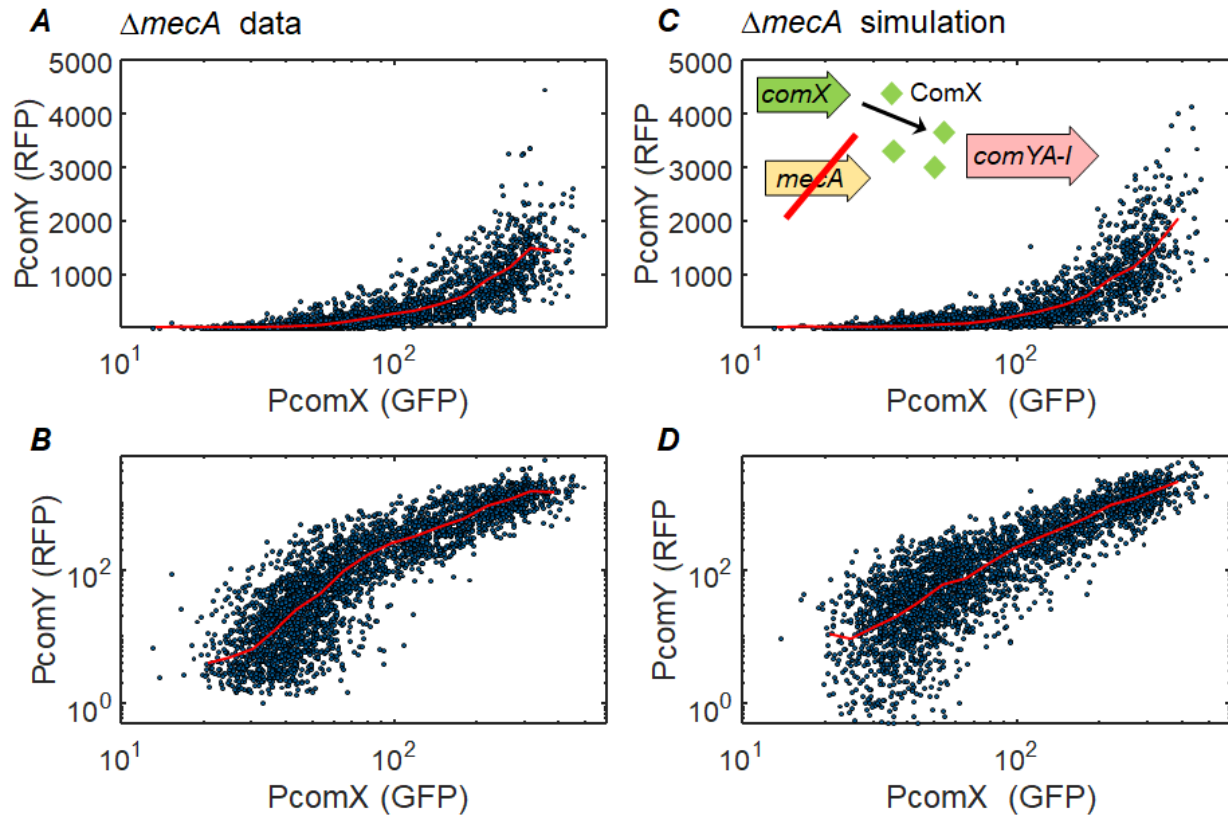

802

803 **Figure 4**

804 Relation between PcomY and PcomX activity in the  $\Delta mecA$  deletion strain, in response to XIP:

805 (A)-(B) Experimental data of Figure 3, showing correlation between PcomX and PcomY

806 expression in  $\Delta mecA$  cells subject to a range of XIP concentrations; (C)-(D) simulation of a

807 stochastic model for *comX* activation of *comY*. The stochastic model, described in *Methods*,

808 assumes that PcomX activity within each cell directly determines the probability distribution for

809 PcomY activation in that cell. The upper and lower rows show the same data on linear and

810 logarithmic vertical scales, respectively. The red curves show the median response. Supporting

811 Figure S2 shows an additional comparison between the data and an alternative model in which

812 the environmental XIP concentration, rather than PcomX activity, determines the probability

813 distribution for PcomY activation. Model parameters are given in the legend to Supporting

814 Figure S2.

815

816

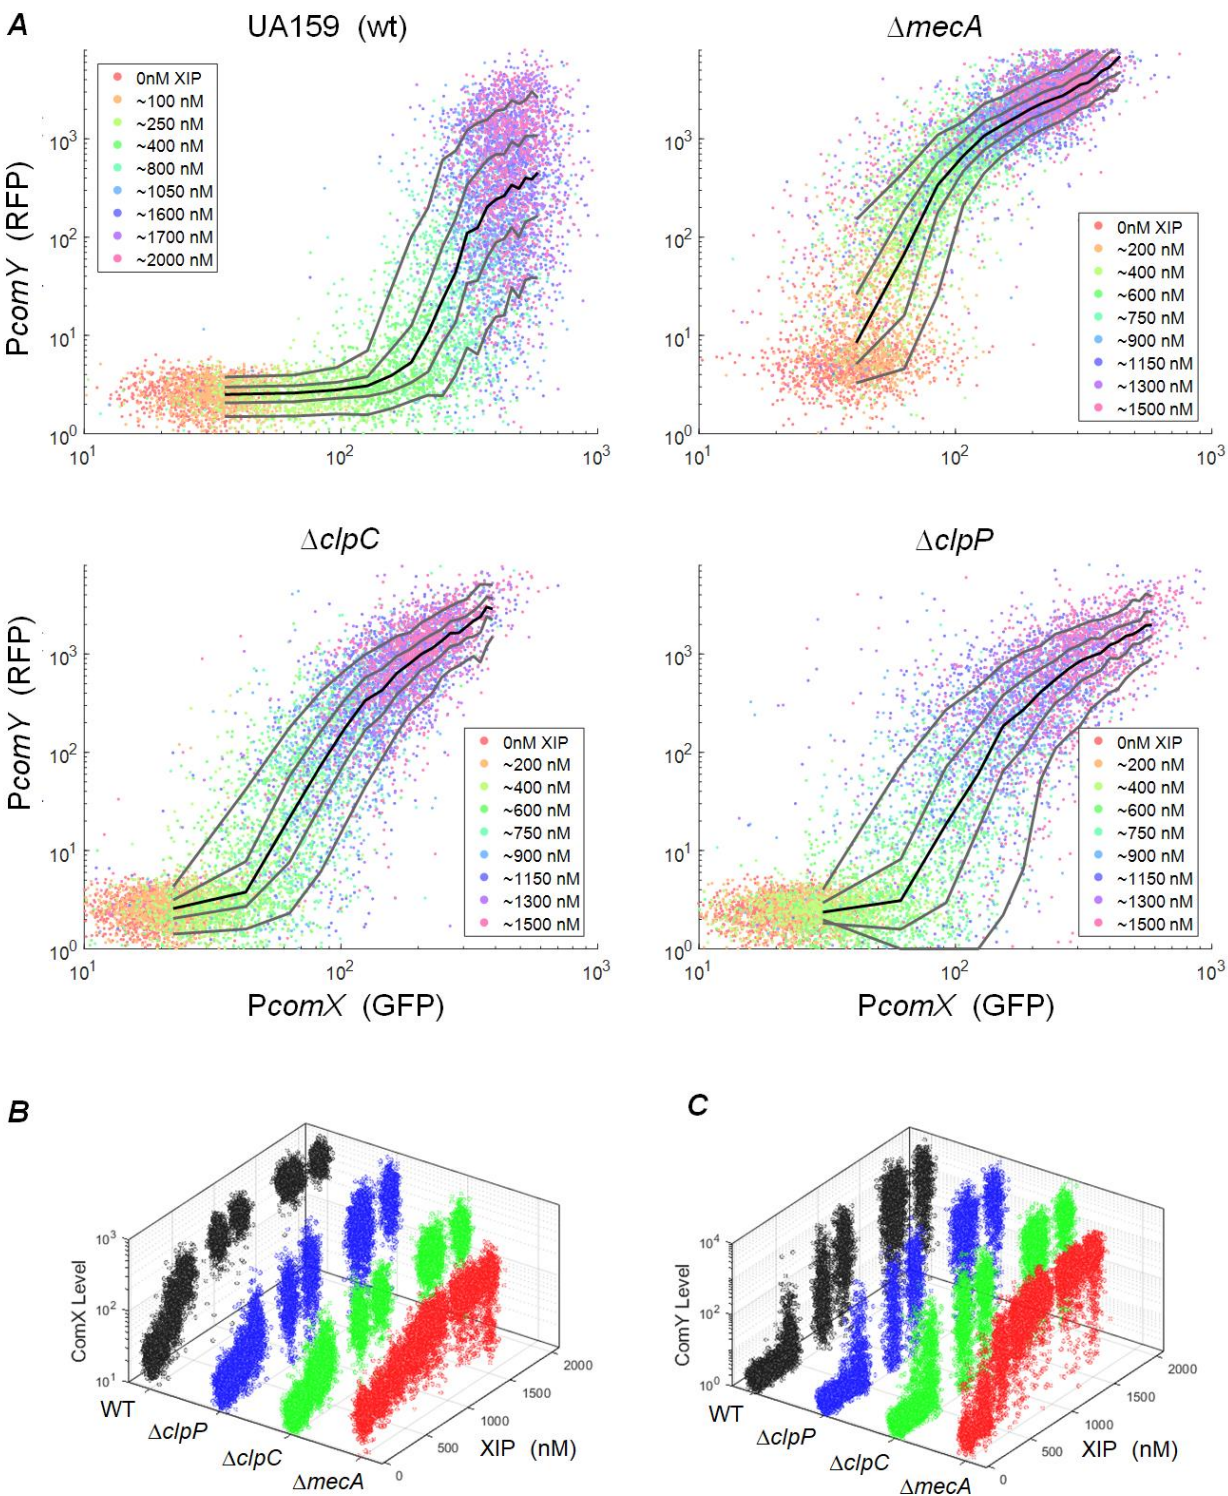

817

818 **Figure 5**

819 (A) Effect of *mecA/clpCP* deletions on the correlation between *comY* and *comX* activation. For

820 each of the four strains (UA159,  $\Delta mecA$ ,  $\Delta clpP$ ,  $\Delta clpC$ ) each point shows the *PcomY* and



821 *PcomX* activity of one cell, as measured by RFP and GFP reporters respectively. Cells were  
822 imaged while growing in microfluidic channels that were supplied with a continuous flow of  
823 defined medium that contained XIP concentrations as indicated by the point color.  
824 Approximately 1000 cells of each strain were imaged at each XIP concentration. Solid lines  
825 indicate the 10, 30, 50, 70, and 90<sup>th</sup> percentiles of *PcomY* activity. Cell autofluorescence  
826 contributes a background red fluorescence that is typically 1-5 fluorescence units in most  
827 experiments. Cell autofluorescence contributes a green background that is typically 20-30  
828 fluorescence units. Supporting Figure S6 shows the same data on linear axes.  
829 (B)-(C) Scatterplots showing individual cell *comX* and *comY* expression versus exogenously  
830 added XIP in the four strains.

831

832

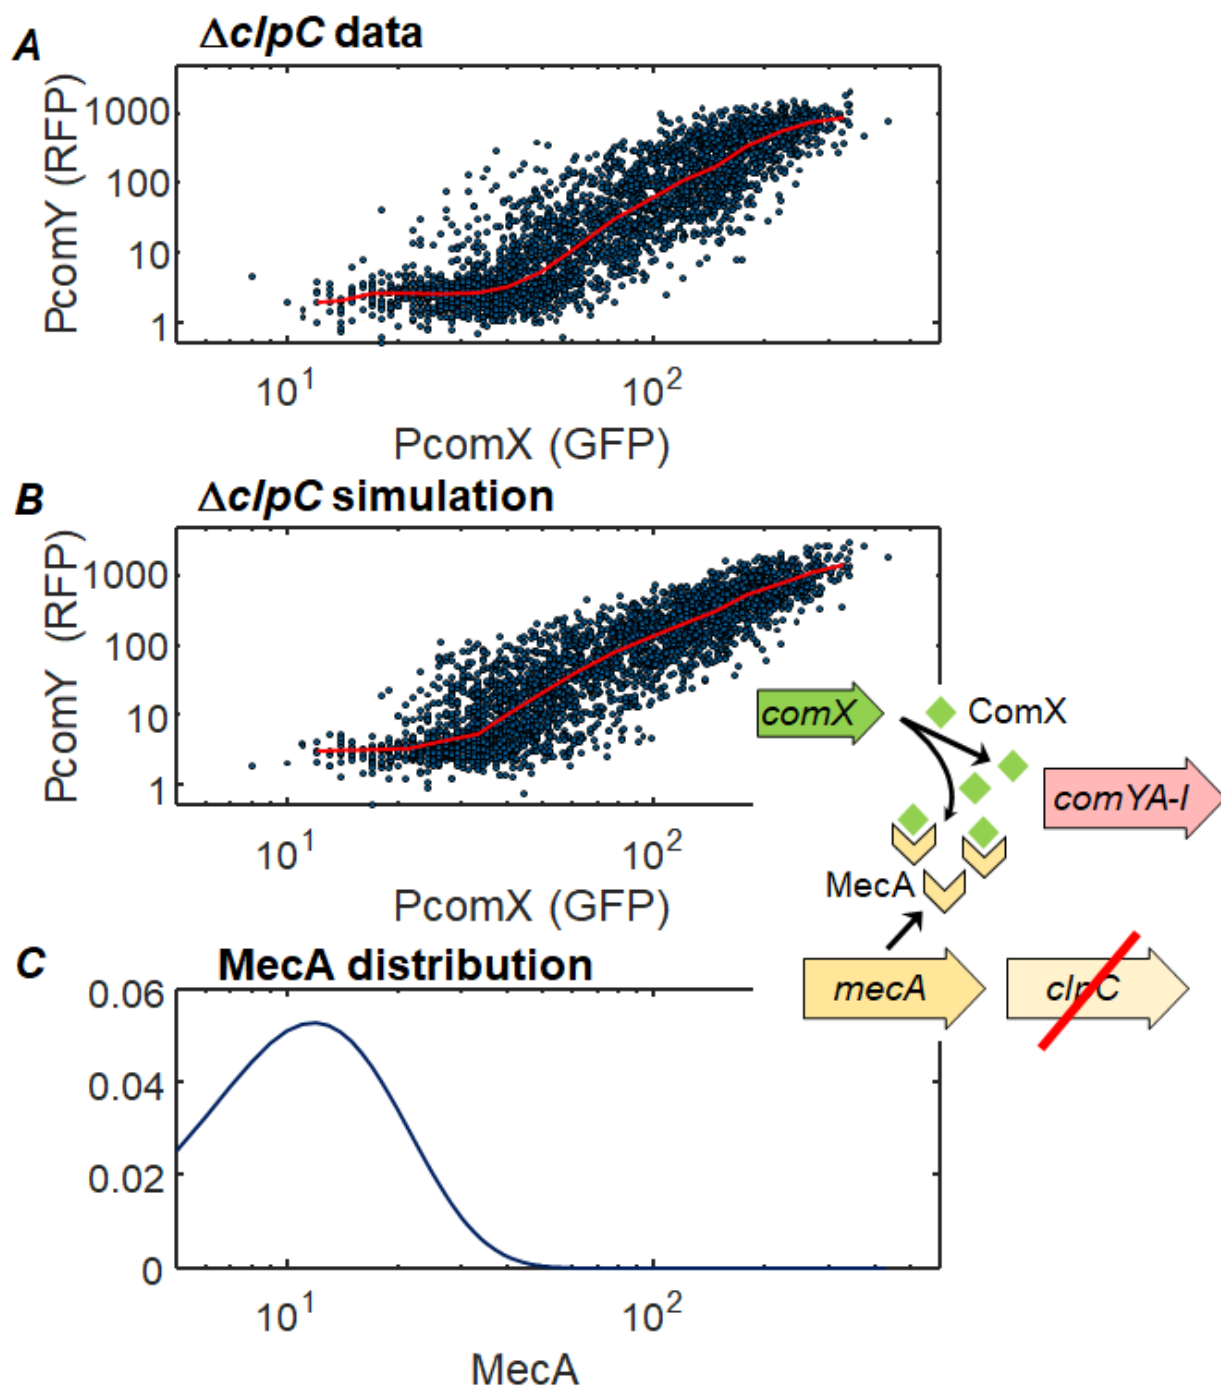

833

834 **Figure 6**

835 Data and model for MecA sequestration of ComX. (A) Experimental measurement of *comX*  
 836 activation of *comY* in dual-reporter (*PcomX-gfp*, *PcomY-rfp*)  $\Delta clpC$  cells. Cells were provided  
 837 50-1000 nM XIP (defined medium) and then imaged on glass slides. The solid red line is the

838 median *PcomY* response. (B) Simulation of a stochastic model (see *Methods*) in which the  
839 activation of *PcomY* in each cell is determined by the excess of the cell's *PcomX* activity over its  
840 *MecA* level, where *MecA* levels obey a gamma statistical distribution. The simulation in (B) uses  
841 the *MecA* distribution (parameters  $A = 3.61$ ,  $B = 4.53$ ) that maximizes the likelihood of the data  
842 in (A). The baseline or background in *comY* is modeled by gaussian noise of  $3 \pm 0.8$  red  
843 fluorescence units. (C) The statistical distribution of *MecA* levels used in generating the  
844 simulation of (B). *MecA* levels are referenced to *PcomX* expression levels: A *MecA* copy  
845 number of 10 implies *MecA* exactly sufficient to sequester all of the *ComX* produced when  
846 *PcomX-gfp* expression is at the level 10.

847



848

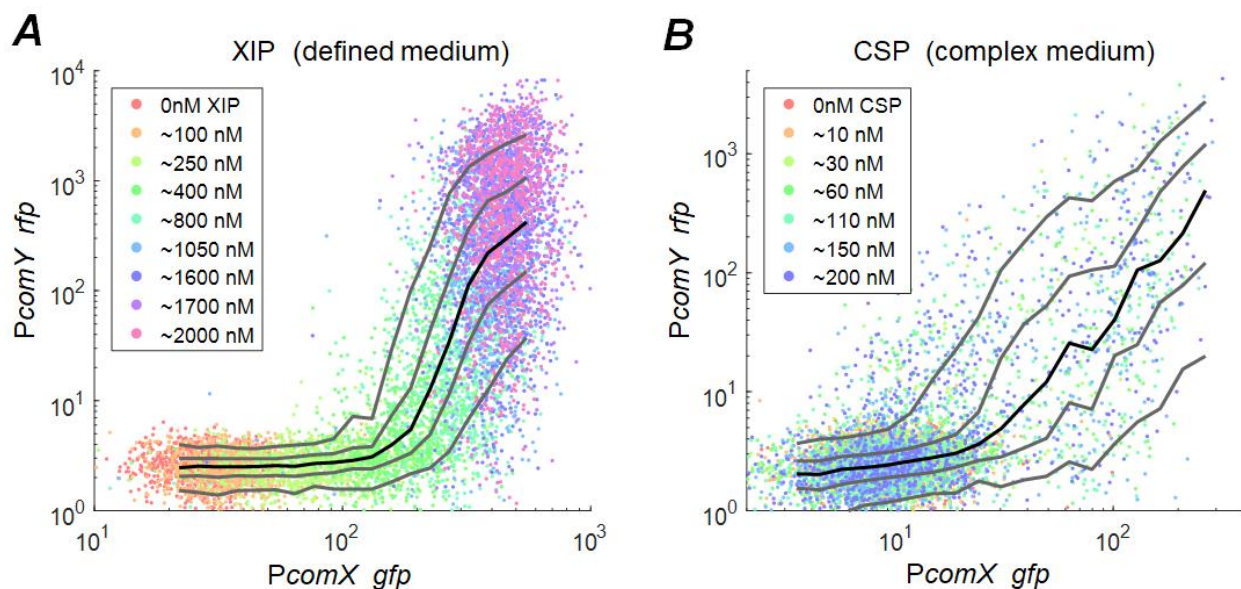

849

850 **Figure 7** – Comparison of *comX/comY* correlation in UA159 background in response to XIP and  
851 CSP. Cells were imaged while adhered in microfluidic flow channels supplied with continuous  
852 flow of (A) defined medium containing XIP or (B) complex medium containing CSP. Solid lines  
853 indicate the 10, 30, 50, 70, and 90<sup>th</sup> percentiles of  $P_{comY}$  activity. Horizontal scales are not  
854 strictly equivalent owing to higher autofluorescence baseline of cells in the complex media.
